# Supplementary material
Source: PubMed Central journal article supplement (PMC5310712)
Supplement: NIHMS844361-supplement-Sup-table_1_2.pdf [file NIHMS844361-supplement-Sup-table_1_2.pdf]

**Supplementary Table 1**

| <b>&gt;9 unq reads</b>       | <b>CN-LM1A_1</b> | <b>CN-LM1A_2</b> | <b>MDA-LM2_1</b> | <b>MDA-LM2_2</b> |
|------------------------------|------------------|------------------|------------------|------------------|
| Parental total SNVs          | 46848            | 52384            | 50829            | 45752            |
| LM total SNVs                | 45288            | 44579            | 53646            | 42851            |
| Common total SNVs            | 30533            | 32277            | 39187            | 33931            |
| Parental total SNPs          | 4849             | 5073             | 7345             | 6932             |
| LM total SNPs                | 4341             | 4153             | 8361             | 7778             |
| Common total SNPs            | 3513             | 3522             | 7012             | 6571             |
| Parental total nSNVs         | 3266             | 3806             | 3667             | 3419             |
| Parental MS nSNVs            | 3248             | 3786             | 3645             | 3402             |
| Parental NS nSNVs            | 18               | 20               | 22               | 17               |
| LM total nSNVs               | 3699             | 3837             | 4120             | 3467             |
| LM MS nSNVs                  | 3675             | 3820             | 4101             | 3453             |
| LM NS nSNVs                  | 14               | 17               | 19               | 14               |
| Parental non-SNP total nSNVs | 755              | 1099             | 1104             | 880              |
| Parental non-SNP MS          | 746              | 1088             | 993              | 871              |
| Parental non-SNP NS          | 9                | 10               | 11               | 9                |
| LM non-SNP total nSNVs       | 1253             | 1423             | 1319             | 899              |
| LM non-SNP MS                | 1239             | 1415             | 1308             | 892              |
| LM non-SNP NS                | 14               | 8                | 11               | 7                |
| LM-enriched nSNVs            | 614              | 708              | 378              | 399              |
| LM nSNVs in seq replicates   | 416              |                  | 360              |                  |
| Recurrent                    | 241              |                  |                  |                  |

| <b>Supplemental Table 2</b>    |                                                                            |
|--------------------------------|----------------------------------------------------------------------------|
| <b>Cloning primers</b>         | <b>Sequence</b>                                                            |
| PANX1-F-EcoRI                  | CGGAATTCATGGCCATCGCTCAACTG                                                 |
| PANX1-R-Sall                   | ACGCGTCGACTCAGCAAGAAGAATCCAGAAGTC                                          |
| PANX1(1-89)-R-Sall             | ACGCGTCGACcctActgaacagccgcccagcaata                                        |
| PANX1-FLG-R_Sall               | ACGCGTCGACTCACTTGTTCATCGTCGCTTGTAGTCGCAAGAAGAATCCAGAAGTC                   |
| (1-89)-FLG-R_sall              | ACGCGTCGACTCACTTGTTCATCGTCGCTTGTAGTCcctgaacagccgcccagcaata                 |
| PANX1(Ct)-Fwd                  | CGGAATTCatGCCATTCCGACAGAAGACAGAT                                           |
| PANX1-delCt-R                  | ACGCGTCGACCTAAACAAACAGCGGTGAGACAACCA                                       |
| CD39_F                         | GGATCCATGAAAAGTGAAGAGTTGGCAGA                                              |
| CD39_R                         | GAATTCCTATACCATATCTTTCCAGAA                                                |
| PANX1_WT-GFP_R                 | GCGGCCGCCCGCAAGAAGAATCCAGAAGTC                                             |
| PANX1_Q90-RFP_R                | GCGGCCGCCCTGAACAGCCGCCAGCAATA                                              |
| pmeLUC-multi-F1                | GTGTGGGTGGCTGTAGTAGGGGAGGCTCAGACAAGGATTatggaagacgcaaaaacataa               |
| pmeLUC-multi-F2-BamHI          | CGGGATCCATGGCTCAGCGGATGACAACACAGCTGCTGCTCCTTCTAGTGTGGGTGGCTGTAGTAG         |
| pmeLUC-multi-R1                | GGCCAGGCTGCCAGGGGCCAGCCCACTCATGGCTGCAGCcaatttgacttccgccc                   |
| pmeLUC-multi-R2-Sall           | ACGCGTCGACTCAGCTGAGCAGCCACAGCAGCATTAGGGCCAGGCTAAGCAGGAAAGGCCAGGCTGCCAGGGCC |
| <b>Sequencing primers</b>      | <b>Sequence</b>                                                            |
| PANX1_C268-F                   | GCCATGGCCATCGCTCAACT                                                       |
| PANX1_C268-R                   | GGCTTCAGATACCTCCACAA                                                       |
| PANX1-seg-1-F                  | GCGCCCCGGGTGACTGG                                                          |
| PANX1-seg-1-R                  | AACTTGGGCTCCGTGGGCTCCTTC                                                   |
| PANX1-seg-2-F                  | CCGGCCGGTGACTGGGTGAAGG                                                     |
| PANX1-seg-2-R                  | GCGAAGGCCAGCGAGATGAGCA                                                     |
| PANX1-seg-3-F                  | GAGCCCACGGAGCCCAAGTTCAAG                                                   |
| PANX1-seg-3-R                  | TCGCAAGAGAGCAGCAGGATGTAGG                                                  |
| KRIT1-F                        | GAAAAACAGATTGAAGACCCACTA                                                   |
| KRIT1-R                        | ACCACGAGACCAGCCTGTTTTGTA                                                   |
| RBFA-F                         | CCTGAGGAATGTGCCACCGATAGT                                                   |
| RBFA-R                         | TCCTGTCTTCTGCCACCTCCTCTC                                                   |
| REST-F                         | AGAGCCTCCCCTTCA                                                            |
| REST-R                         | CGAGCCCCATGCAATCCAGA                                                       |
| ZSWIM6-F                       | AGCCACTTGCAGCACATTATCAGC                                                   |
| ZSWIM6-R                       | CAGCGAGGGTAGCGGTTGG                                                        |
| Panx1-gDNA-F                   | CTGTTGGGAGGTTGCAATCGTG                                                     |
| Panx1-gDNA-R                   | AGATACAGCACTGGTTGGCTACAA                                                   |
| <b>Allele Specific Primers</b> |                                                                            |
| asC268T-F                      | TCCCTACACGACGCTCTCCGATCTATTACGCGCTTTGTGGATTCATATTGC                        |
| asC268T-R                      | GTTACAGAGTGTGCTCTTCCGATCTGGGAGGTTCCAGACTCG                                 |
| Illumina_C268T-F               | AATGATACGGGACACCAGGATCTACACTCTTTCCCTACACGACGCTCTCCGATCT                    |
| Illumina_C268T-R               | CAAGCAGAAGACGGCATAACGAGATCGTGACTGGAGTTCAGACGTGTGCTCTCCGATCT                |
| <b>Quickchange Primers</b>     |                                                                            |
| Casp-Res-F                     | GGCATGATCAAGATGGCTGTTGTTGCTGGCAAACTCCCATG                                  |
| Casp-Res-R                     | CATGGGAGTTTTGCCAGCAACAACAGCCATCTTGATCATGCC                                 |
| <b>Quickchange Primers</b>     |                                                                            |
| Px1-WT-MS-F-EcoRI-2            | CGGAATTCATGGGTGGCGGATCCAGGAGGTGGTGAATGGCCATCGCTCAACTG                      |
| Q90-MS-F-EcoRI-2               | CGGAATTCATGGGTGGCGATCCAGGAGGAGGTGGTGAATGGCCATCGCTCAACTG                    |
| PANX1-SYBR-F                   | AGCCCACGGAGCCCAAGTTCA                                                      |
| PANX1-SYBR-R                   | GCGCGAAGGCCAGCGAGAT                                                        |
